# Supplementary material
Source: PubMed Central journal article supplement (PMC3805105)
Supplement: NIHMS489730-supplement-01.pdf [file NIHMS489730-supplement-01.pdf]

Suppl. figure 1. MST tree for the MAP study in the rat.

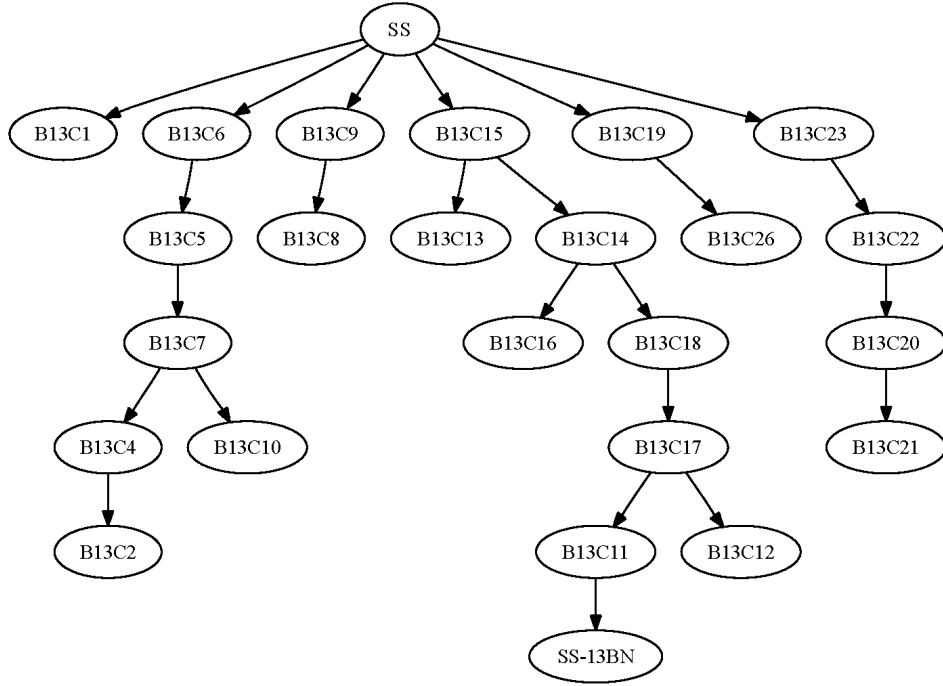

Suppl. table 1. Pseudo-code for a Minimum Spanning Tree based on Kruskal's algorithm.

Because each vertex is in exactly one tree, we use a collection of disjoint sets as data structure with the following functions:

make\_set(x): create a disjoint set with element x.

find(x): find which set is element x in

union(x,y): replace set containing x and y with their union

Given graph  $G=(V,E)$ , let T be the MST under construction

1. Sort edges  $E: (u,v)$  by cost/weight
2.  $T = \{\}$
3. For x in V  
    make\_set(x)
4. For  $(u,v)$  in E (increasing order):  
    If  $\text{find}(u) \neq \text{find}(v)$   
         $T \leftarrow T \cup \{(u,v)\}$   
        union(u,v)  
    end if  
end For

Suppl. table 2A. Mean arterial pressure (MAP) in females. QTL locations highlighted with a black border were identified with the common segment method (Moreno et al. 2007), whereas QTLs highlighted in pink were identified with the sequential method.

| marker  | D13Rat7 | D13Rat60 | D13Rat11 | D13Rat15 | D13Rat20 | D13Rat88 | D13Rat12 | D13Got22 | D13Rat91 | D13Rat101 | D13Rat127 | D13Rat176 | D13Rat178 | D13Rat177 | D13Rat151 | D13Rat61 | D13Got45 | D13Got51 | D13Rat46 | D13Rat191 | D13Rat18 | D13Rat57 | D13Rat82 |
|---------|---------|----------|----------|----------|----------|----------|----------|----------|----------|-----------|-----------|-----------|-----------|-----------|-----------|----------|----------|----------|----------|-----------|----------|----------|----------|
| SS      | S       | S        | S        | S        | S        | S        | S        | S        | S        | S         | S         | S         | S         | S         | S         | S        | S        | S        | S        | S         | S        | S        | S        |
| B13C1   | B       | B        | B        | B        | B        | B        | B        | B        | B        | B         | B         | B         | B         | B         | B         | B        | B        | B        | B        | B         | B        | B        | B        |
| B13C2   | B       | B        | B        | B        | B        | B        | B        | B        | B        | B         | B         | B         | B         | B         | B         | B        | B        | B        | B        | B         | B        | B        | B        |
| B13C4   | B       | B        | B        | B        | B        | B        | B        | B        | B        | B         | B         | B         | B         | B         | B         | B        | B        | B        | B        | B         | B        | B        | B        |
| B13C5   | S       | S        | S        | S        | S        | S        | S        | S        | S        | S         | S         | S         | S         | S         | S         | S        | S        | S        | S        | S         | S        | S        | S        |
| B13C6   | S       | S        | S        | S        | S        | S        | S        | S        | S        | S         | S         | S         | S         | S         | S         | S        | S        | S        | S        | S         | S        | S        | S        |
| B13C7   | S       | S        | S        | S        | S        | S        | S        | S        | S        | S         | S         | S         | S         | S         | S         | S        | S        | S        | S        | S         | S        | S        | S        |
| B13C8   | S       | S        | S        | S        | S        | S        | S        | S        | S        | S         | S         | S         | S         | S         | S         | S        | S        | S        | S        | S         | S        | S        | S        |
| B13C9   | S       | S        | S        | S        | S        | S        | S        | S        | S        | S         | S         | S         | S         | S         | S         | S        | S        | S        | S        | S         | S        | S        | S        |
| B13C10  | S       | S        | S        | S        | S        | S        | S        | S        | S        | S         | S         | S         | S         | S         | S         | S        | S        | S        | S        | S         | S        | S        | S        |
| B13C11  | S       | S        | S        | S        | S        | S        | S        | S        | S        | S         | S         | S         | S         | S         | S         | S        | S        | S        | S        | S         | S        | S        | S        |
| B13C12  | S       | S        | S        | S        | S        | S        | S        | S        | S        | S         | S         | S         | S         | S         | S         | S        | S        | S        | S        | S         | S        | S        | S        |
| B13C13  | S       | S        | S        | S        | S        | S        | S        | S        | S        | S         | S         | S         | S         | S         | S         | S        | S        | S        | S        | S         | S        | S        | S        |
| B13C14  | S       | S        | S        | S        | S        | S        | S        | S        | S        | S         | S         | S         | S         | S         | S         | S        | S        | S        | S        | S         | S        | S        | S        |
| B13C15  | S       | S        | S        | S        | S        | S        | S        | S        | S        | S         | S         | S         | S         | S         | S         | S        | S        | S        | S        | S         | S        | S        | S        |
| B13C16  | S       | S        | S        | S        | S        | S        | S        | S        | S        | S         | S         | S         | S         | S         | S         | S        | S        | S        | S        | S         | S        | S        | S        |
| B13C17  | S       | S        | S        | S        | S        | S        | S        | S        | S        | S         | S         | S         | S         | S         | S         | S        | S        | S        | S        | S         | S        | S        | S        |
| B13C18  | S       | S        | S        | S        | S        | S        | S        | S        | S        | S         | S         | S         | S         | S         | S         | S        | S        | S        | S        | S         | S        | S        | S        |
| B13C19  | S       | S        | S        | S        | S        | S        | S        | S        | S        | S         | S         | S         | S         | S         | S         | S        | S        | S        | S        | S         | S        | S        | S        |
| B13C20  | S       | S        | S        | S        | S        | S        | S        | S        | S        | S         | S         | S         | S         | S         | S         | S        | S        | S        | S        | S         | S        | S        | S        |
| B13C21  | S       | S        | S        | S        | S        | S        | S        | S        | S        | S         | S         | S         | S         | S         | S         | S        | S        | S        | S        | S         | S        | S        | S        |
| B13C22  | S       | S        | S        | S        | S        | S        | S        | S        | S        | S         | S         | S         | S         | S         | S         | S        | S        | S        | S        | S         | S        | S        | S        |
| B13C23  | S       | S        | S        | S        | S        | S        | S        | S        | S        | S         | S         | S         | S         | S         | S         | S        | S        | S        | S        | S         | S        | S        | S        |
| SS-13BN | B       | B        | B        | B        | B        | B        | B        | B        | B        | B         | B         | B         | B         | B         | B         | B        | B        | B        | B        | B         | B        | B        | B        |

  

| vs      | otfl | sig      | pval     | pval/nTest | str1   | str2    | sig | pval     | pval/nTest |
|---------|------|----------|----------|------------|--------|---------|-----|----------|------------|
| B13C1   |      | 1        | 0.00062  | 0.000396   | SS     | B13C1   | 1   | 0.00062  | 0.000396   |
| B13C2   | 0    | 0.032583 | 2.246146 |            | B13C4  | B13C2   | 0   | 0.005429 | 0.100269   |
| B13C4   | 1    | 3.81E-05 | 0.000915 |            | B13C7  | B13C4   | 0   | 0.736689 | 17.88005   |
| B13C5   | 1    | 0.00128  | 0.03072  |            | B13C6  | B13C5   | 1   | 0.000291 | 0.00638    |
| B13C6   | 0    | 0.38541  | 9.249848 |            | SS     | B13C6   | 0   | 0.38541  | 9.249848   |
| B13C7   | 1    | 0.000495 | 0.01872  |            | B13C5  | B13C7   | 0   | 0.931873 | 22.36496   |
| B13C8   | 0    | 0.003082 | 0.073966 |            | B13C9  | B13C8   | 0   | 0.554823 | 13.31814   |
| B13C9   | 0    | 0.018623 | 0.446362 |            | SS     | B13C9   | 0   | 0.018623 | 0.446362   |
| B13C10  | 1    | 0.001819 | 0.043664 |            | B13C7  | B13C10  | 0   | 0.568458 | 13.64298   |
| B13C11  | 1    | 7.5E-05  | 0.001801 |            | B13C17 | B13C11  | 0   | 0.246361 | 5.912655   |
| B13C12  | 0    | 0.284472 | 6.82734  |            | B13C17 | B13C12  | 0   | 0.007208 | 0.172992   |
| B13C13  | 0    | 0.531298 | 12.75116 |            | B13C15 | B13C13  | 0   | 0.470223 | 11.28536   |
| B13C14  | 0    | 0.607879 | 14.58909 |            | B13C15 | B13C14  | 0   | 0.07413  | 1.779118   |
| B13C15  | 0    | 0.224085 | 5.378035 |            | SS     | B13C15  | 0   | 0.224085 | 5.378035   |
| B13C16  | 0    | 0.27833  | 6.679329 |            | B13C14 | B13C16  | 0   | 0.091775 | 2.202612   |
| B13C17  | 1    | 0.00046  | 0.01041  |            | B13C18 | B13C17  | 0   | 0.302368 | 7.258821   |
| B13C18  | 1    | 0.000606 | 0.014534 |            | B13C14 | B13C18  | 1   | 4.41E-05 | 0.001053   |
| B13C26  | 1    | 0.000114 | 0.002725 |            | B13C19 | B13C26  | 0   | 0.005454 | 0.130889   |
| B13C19  | 0    | 0.205545 | 4.933086 |            | SS     | B13C19  | 0   | 0.205545 | 4.933086   |
| B13C20  | 0    | 0.197381 | 4.737153 |            | B13C22 | B13C20  | 0   | 0.809791 | 19.43499   |
| B13C21  | 0    | 0.196364 | 4.712735 |            | B13C20 | B13C21  | 0   | 0.784141 | 18.81939   |
| B13C22  | 0    | 0.368072 | 8.833728 |            | B13C23 | B13C22  | 0   | 0.653561 | 15.68546   |
| B13C23  | 0    | 0.518482 | 12.44356 |            | SS     | B13C23  | 0   | 0.518482 | 12.44356   |
| SS-13BN | 1    | 5.93E-10 | 1.42E-08 |            | B13C11 | SS-13BN | 0   | 0.343175 | 8.236204   |

Black Bordered boxes were identified by the paper  
 Pink boxes were identified by the sequential method



Suppl. table 2C. Genetic markers for studying MAP (see Moreno et al. 2007 for details).

| <b>Marker</b> | <b>Left</b> | <b>Right</b> |
|---------------|-------------|--------------|
| D13Rat7       | 1084269     | 1084470      |
| D13Rat60      | 13053809    | 13053933     |
| D13Rat111     | 32030140    | 32.30259     |
| D13Rat115     | 35719011    | 35719148     |
| D13Rat20      | 38329090    | 38329229     |
| D13Rat88      | 42627611    | 42627837     |
| D13Rat123     | 44872182    | 44872315     |
| D13Got22      | 45828609    | 45828716     |
| D13Rat91      | 46911976    | 46912163     |
| D13Rat101     | 49428398    | 49428577     |
| D13Rat127     | 55373162    | 55373537     |
| D13Rat178     | 59830974    | 59831216     |
| D13Rat179     | 60669452    | 60669696     |
| D13Rat77      | 63175275    | 63175600     |
| D13Rat151     | 64083141    | 64083335     |
| D13Rat61      | 68034721    | 68034927     |
| D13Got45      | 69494048    | 69494326     |
| D13Got51      | 72638817    | 72638941     |
| D13Rat46      | 77336099    | 77336322     |
| D13Rat197     | 80109433    | 80109632     |
| D13Rat183     | 80966179    | 80966380     |
| D13Rat57      | 84280243    | 84280390     |
| D13Rat192     | 100133218   | 100133413    |



Suppl. table 3. SNP markers for Chromosome 13.

| <b>Marker</b> | <b>Left</b> | <b>Right</b> |
|---------------|-------------|--------------|
| D13M236       | 4363272     | 4363368      |
| D13M218       | 19636983    | 19637157     |
| D13M88        | 38770728    | 38770896     |
| D13M99        | 77262943    | 77263147     |
| D13M126       | 85806862    | 85807000     |
| D13M106       | 93838592    | 93838725     |
| D13M77        | 118025687   | 118025961    |
